# Supplementary material
Source: Springer Nature journal article supplement (https://www.springermedizin.de/resource/supplementary/12879_2011_1928_MOESM1_ESM.pdf/9443274)
Supplement: MOESM1 [file 9443274]

**Table 1.** Clinical characteristics of patients with benign 3<sup>rd</sup> and 6<sup>th</sup> nerve palsy post-immunization

| <u>Authors</u>               | <u>Age/Gender/Side of paralysis</u> | <u>Vaccine Type</u> | <u>CN</u> | <u>Time-post Vaccine</u> | <u>Investigations</u>                                                                                                                                                                                                                                 | <u>Outcome</u>                                                                                                                                             |
|------------------------------|-------------------------------------|---------------------|-----------|--------------------------|-------------------------------------------------------------------------------------------------------------------------------------------------------------------------------------------------------------------------------------------------------|------------------------------------------------------------------------------------------------------------------------------------------------------------|
| Werner <i>et al</i> [5]      | 1 yr 3 mths/F/L                     | MMR                 | VI        | 10 days                  | CT Brain                                                                                                                                                                                                                                              | Resolved over 3 months                                                                                                                                     |
|                              | 0 yr 8 mths/F/L                     | DPT                 | VI        | 6 weeks                  | Nil                                                                                                                                                                                                                                                   | Resolved over 6 months                                                                                                                                     |
|                              |                                     | DPT Booster         | VI        | 3mths                    | Nil                                                                                                                                                                                                                                                   | Resolved over 2 months                                                                                                                                     |
| McCormick <i>et al</i> [19]  | 1yr 1 mth/F/L                       | MMR                 | VI        | 1 week                   | FBE, CRP, Anti-Nuclear Antibody (ANA), Measles and mumps serum titers, Anti-Mitochondrial antibody, blood cultures, serum rotavirus titer<br>Feces culture for parasites and <i>C difficile</i><br>CT Brain                                           | Resolved over 8 weeks                                                                                                                                      |
| Leidermann <i>et al</i> [20] | 1 yr 5 mths/M/R                     | Influenza           | VI        | 3 weeks                  | MRI Brain (T1, T2, Flair)                                                                                                                                                                                                                             | Initial 10-20 degree incomitant esotropia with limitation of abduction<br>12 weeks – 10 degree esotropia in R gaze<br>7 months – residual motility deficit |
| Sturm <i>et al</i> [3]       | 6 mths/M/R                          | DPT, Polio, Hib     | VI        | 6 months                 | MRI Brain                                                                                                                                                                                                                                             | Resolved at 5 days                                                                                                                                         |
| Mahoney <i>et al</i> [21]    | 1 yr 8 mths/M/L                     | DPT, Hib            | VI        | 3 weeks                  | MRI, AchRab                                                                                                                                                                                                                                           | Improving but incomplete                                                                                                                                   |
|                              | 2 yr 7 mths/M/L                     | VZV                 | VI        | 2.5 weeks                |                                                                                                                                                                                                                                                       |                                                                                                                                                            |
| Manzotti <i>et al</i> [22]   | 20mths/M/L                          | MMR                 | III       | 3 weeks                  | FBE, UEC<br>CMV, EBV, HSV, VZV, Parvo B19, Influenza, Parainfluenza, RSV titers<br>Electroencephalography, MRI brain                                                                                                                                  | Resolved at 20 days                                                                                                                                        |
| Chan <i>et al</i> [23]       | 1 yr 5 mths/M/R                     | Edmonston Measles   | III       | 2 weeks                  | FBE, UEC, ESR, blood sugar level, CSF for protein, glucose, viral, bacterial, Blood cultures, Serum measles titer<br>Skull x-ray, electroencephalography, CT Brain<br>PPD Tuberculin Skin test<br>Intravenous Pyelogram (IVP)<br>Bone marrow aspirate | Resolved at 2 months                                                                                                                                       |

FBE = full blood examination, UEC = urea, electrolytes, creatinine, CRP = C-reactive protein, CT = computed tomography, MRI = magnetic resonance imaging, CMV = cytomegalovirus, EBV = Epstein-Barr virus, HSV = herpes simplex virus, VZV = varicella zoster virus, RSV = respiratory syncytial virus  
DTP= *diphtheria-tetanus –pertussis*; MMR= *measles-mumps-rubella*; Hib= *Haemophilus influenzae type b*, AchRab = acetylcholine receptor antibody testing;
